# Supplementary material
Source: ML conference proceedings conference paper supplement (https://www.ecva.net/papers/eccv_2020/papers_ECCV/html/123750375_ECCV_2020_paper.php)
Supplement: Supplementary file 1 [file 123750375-supp.zip]

# PieNet: Personalized Image Enhancement Network -Supplement Material-

Han-Ul Kim<sup>1</sup>[0000–0001–7450–6600], Young Jun Koh<sup>2</sup>[0000–0003–1805–2960], and  
Chang-Su Kim<sup>1</sup>[0000–0002–4276–1831]

<sup>1</sup> Korea University, Seoul, Korea  
hanulkim@mcl.korea.ac.kr, changsukim@korea.ac.kr  
<sup>2</sup> Chungnam National University, Daejeon, Korea  
yjkoh@cnu.ac.kr

## § User Study

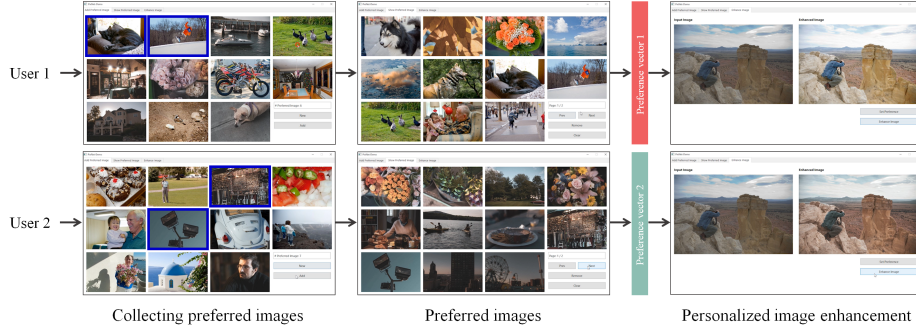

Fig. S-1: Illustration of the proposed personalization system.

- Fig. S-1 illustrates the user interface of the proposed personalization system for the user study in section 4.3. To collect preferred images, the system displays many types of pre-enhanced images. A user selects their preferred images among them. In this example, by employing 15 and 13 preferred images for users 1 and 2, PieNet produces personalized enhancement results effectively. Please see the supplementary video, which demonstrates this process.

## § Additional Experiments on MIT Adobe 5K dataset

- Table S-1 compares the PSNR scores of proposed algorithm with DUPE (2nd best performing method in Table 1). In Table S-1, we train DUPE for

Table S-1: Comparison of the proposed algorithm with DUPE [40] on MIT-Adobe 5K.

| Method    | A     | B     | C     | D     | E     |
|-----------|-------|-------|-------|-------|-------|
| DUPE [40] | 23.05 | 23.75 | 23.61 | 23.18 | 23.20 |
| Proposed  | 23.02 | 25.82 | 25.50 | 23.33 | 23.75 |

each photographer. Thus, DUPE needs five networks in total. In contrast, as a single network, the proposed PieNet enhances images for the five photographers adaptively using their preference vectors. Nevertheless, Table S-1 shows that PieNet provides better results for photographers B/C/D/E and is comparable for photographer A. On average, PieNet outperforms DUPE by 0.92 dB.

- Fig. S-2 compares qualitative enhancement results of the proposed algorithm with conventional algorithms: HDR [14], DPE [9], and DUPE [40]. The ‘single user’ setting in Table 1 in the main paper is adopted for all algorithms, which performs supervised learning using pairs of input and ground-truth (manually enhanced images by photographer C). We observe that the proposed PieNet yields much similar images to ground-truths than the conventional algorithms do.
- Fig. S-3 and Fig. S-4 provide more personalized results of the proposed algorithm for photographers A/B/C/D/E on the MIT-Adobe5K dataset (the ‘multiple users’ test in Table 1). We see that the proposed algorithm adaptively produces output images in photographers A/B/C/D/E’s styles, respectively.

## § Additional Experiments on the expanded MIT Adobe 5K dataset

- Fig. S-5 shows an example of the expanded MIT Adobe 5k dataset. The first fifteen images are obtained using predefined settings in Adobe Lightroom. And we generate 8 enhanced results by conventional algorithms [2, 3, 6, 12, 13, 16, 29, 41]. Also, the expanded dataset includes five photographer’s results in the MIT Adobe 5k dataset[5]. Note that these methods provide differently enhanced images and represent various preference styles of users.
- Fig. S-6 provides additional personalized results for five users (LDR, WVM, Lightroom Natural, Lightroom RedLiftMatte, and photographer E) in the test set of the expanded MIT-Adobe5K dataset. These personalized results demonstrate the excellent scalability of the proposed algorithm to accommodate new users.



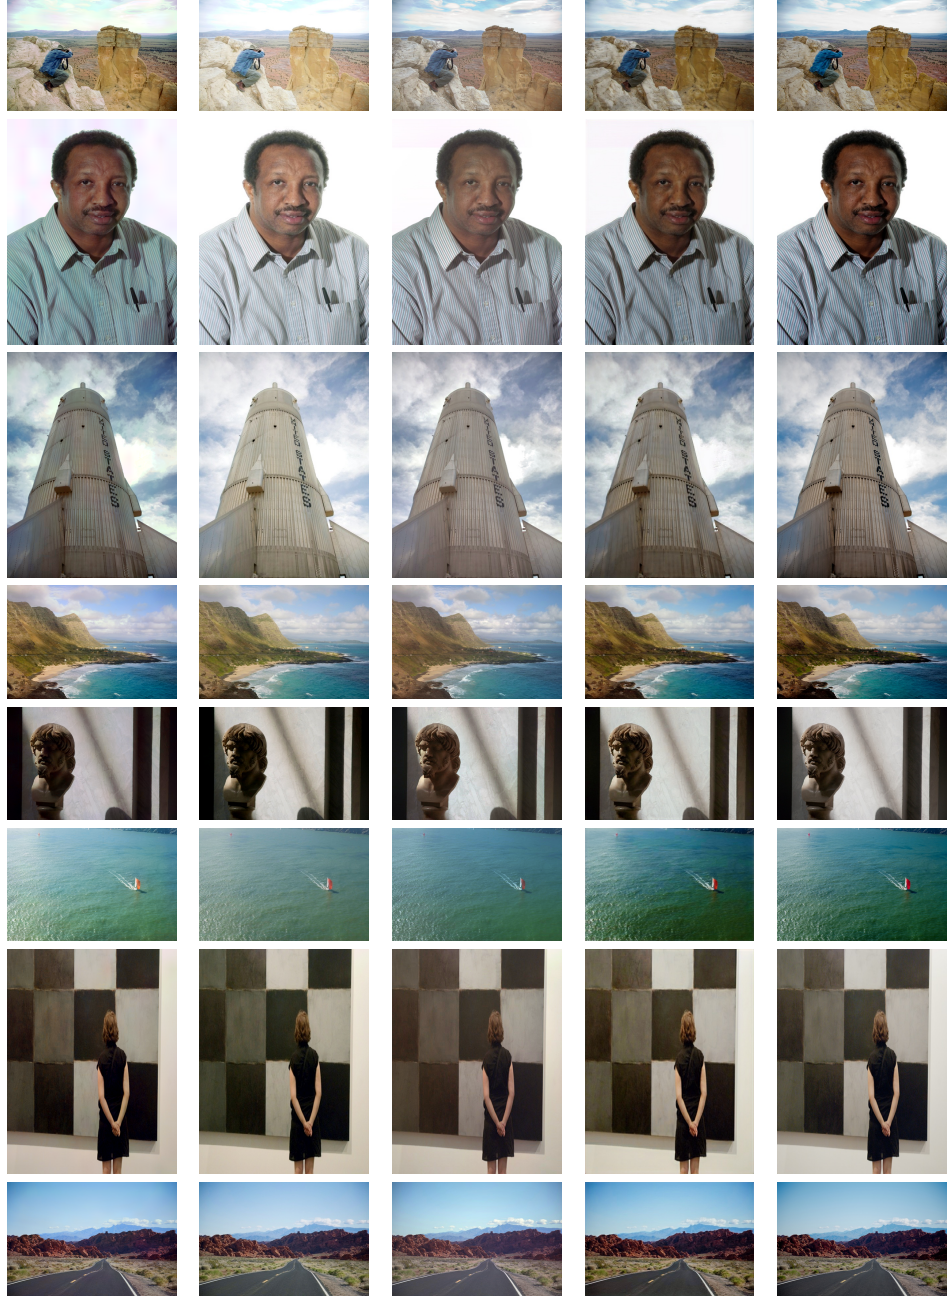

(a) HDR [14] (b) DPE [9] (c) DUPE [40] (d) Proposed (e) Photographer C

Fig. S-2: Qualitative comparison of the proposed algorithm with the conventional algorithms [9,14,40] on MIT-Adobe 5K. As ground-truth images, we use the enhanced images by photographer C.

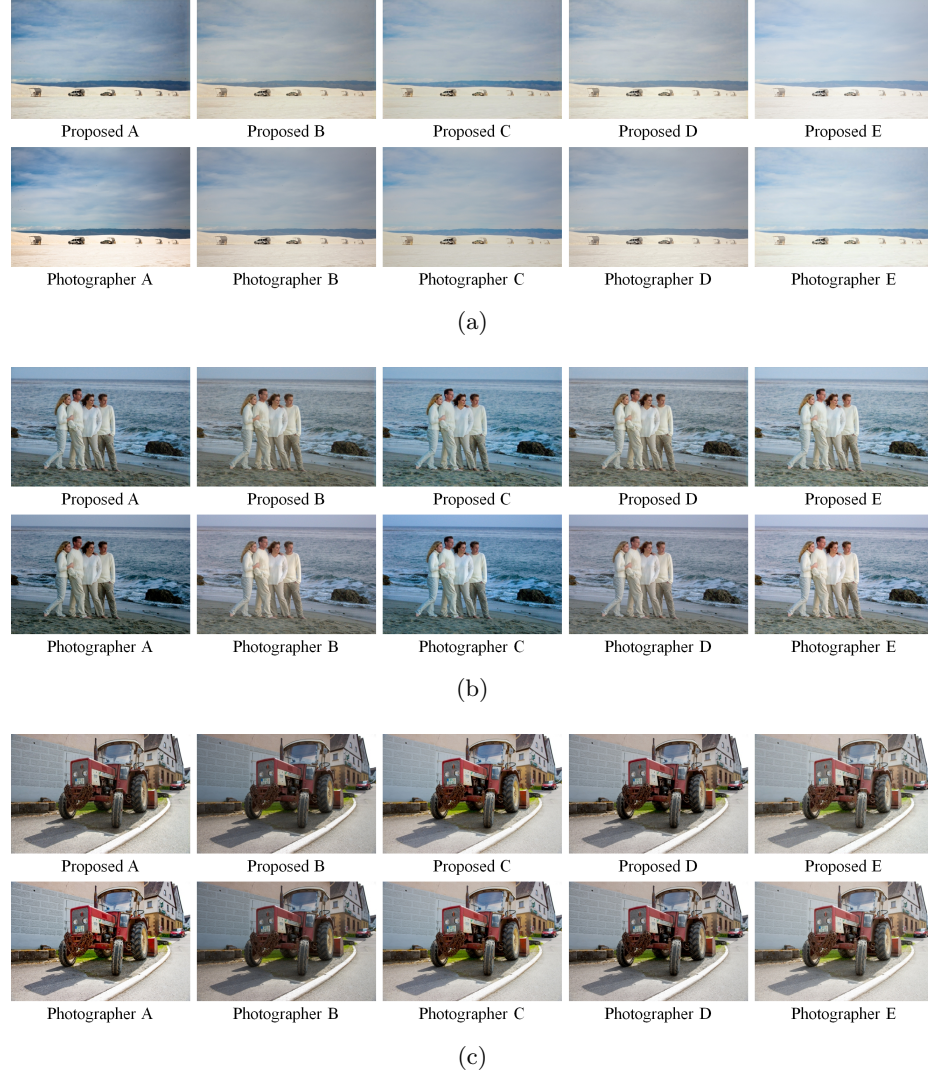

Fig. S-3: Personalized image enhancement results of the proposed algorithm for photographers A/B/C/D/E.



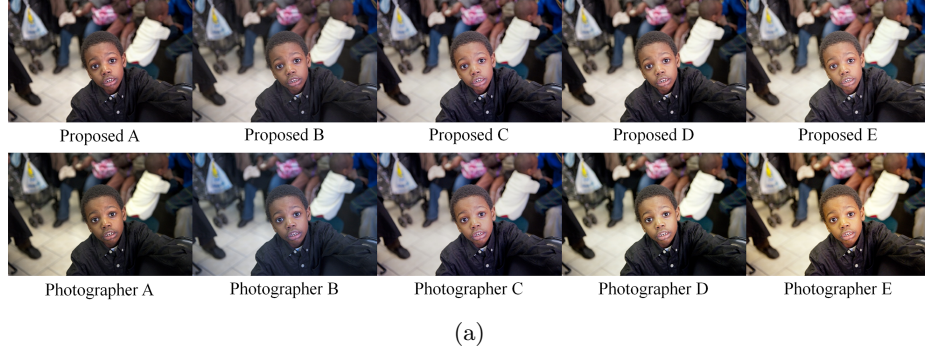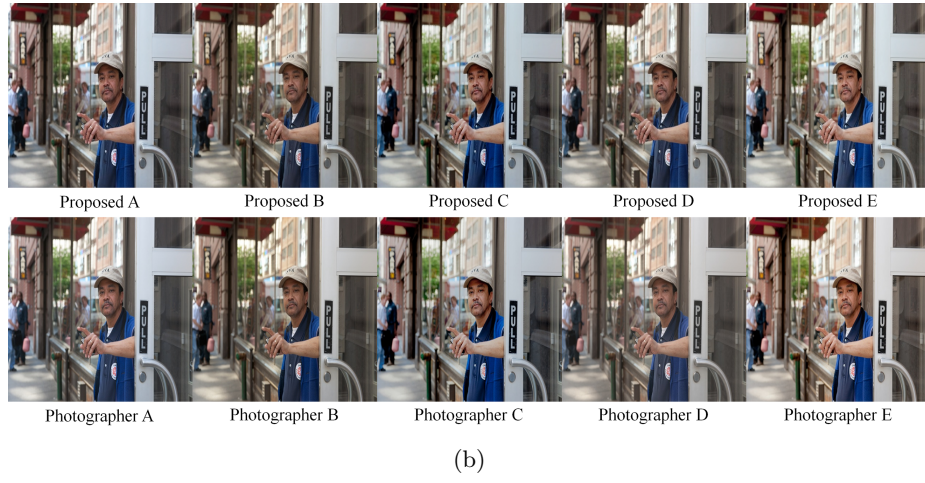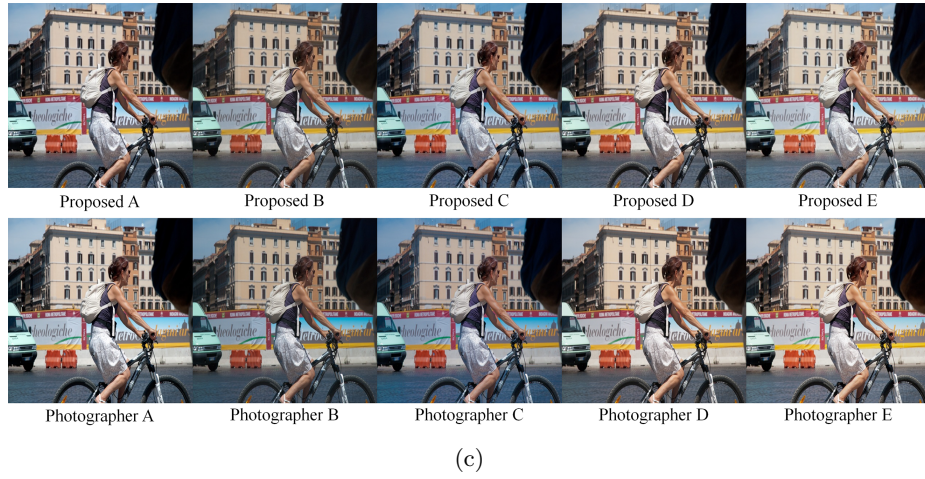

Fig. S-4: Personalized image enhancement results of the proposed algorithm for photographers A/B/C/D/E.

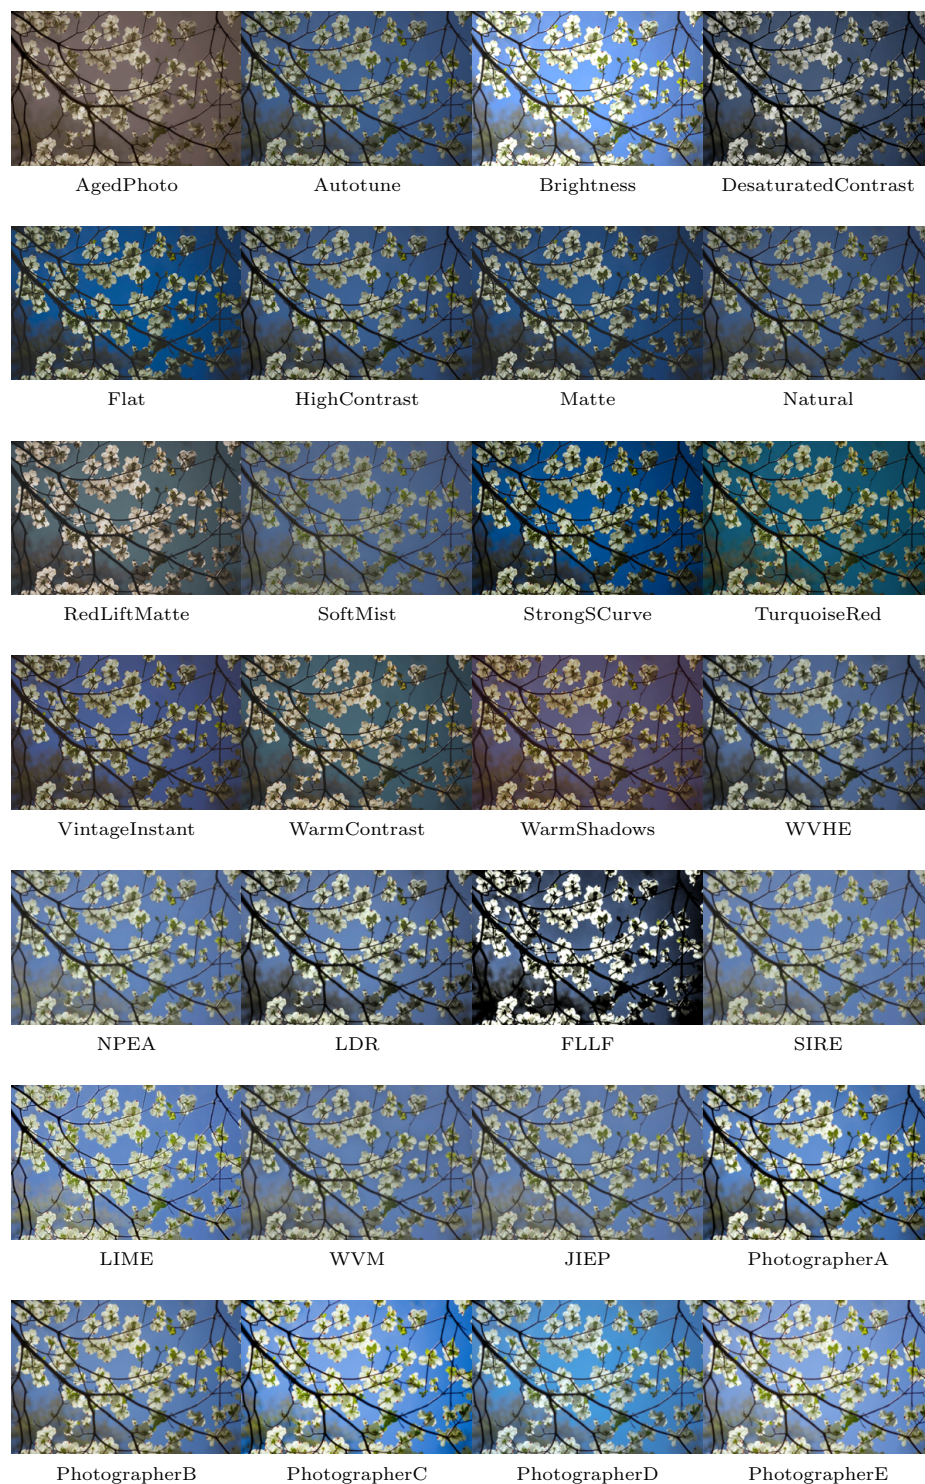

Fig. S-5: An example of the expanded MIT-Adobe 5k dataset



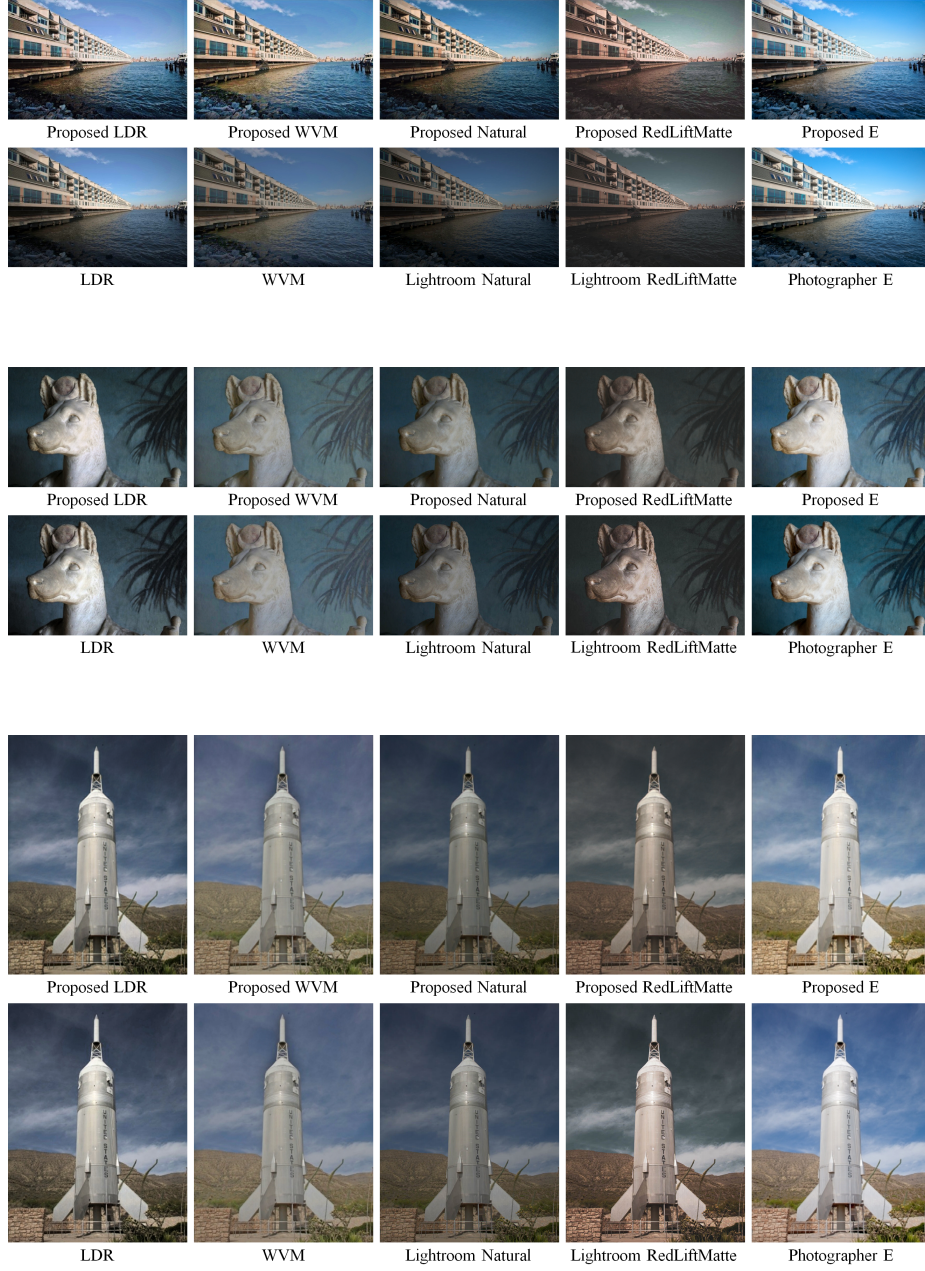

Fig. S-6: Personalized image enhancement results of the proposed algorithm for five users in the test set of the expanded MIT-Adobe5K dataset. In this test, we use 20 preferred images to generate each preference vector.
